1 **Title**

2 **A multicentre point prevalence survey of patterns and quality of antibiotic prescribing in**  
3 **Indonesian hospitals**

4  
5 **Authors**

6 Ralalicia Limato<sup>1,2</sup>, Erni J. Nelwan<sup>3,4,5,6</sup>, Manzilina Mudia<sup>1</sup>, Justin de Brabander<sup>1</sup>, Helio Guterres<sup>3,4</sup>,  
7 Enty Enty<sup>7,8</sup>, Ifael Y. Mauleti<sup>9</sup>, Maria Mayasari<sup>10</sup>, Iman Firmansyah<sup>11</sup>, May Hizrani<sup>6</sup>, Raph L.  
8 Hamers<sup>1,2,4</sup>

9  
10 **Affiliations and addresses**

- 11 1. Eijkman-Oxford Clinical Research Unit, Jakarta, Indonesia (Jl. Diponegoro No.69, Jakarta  
12 Pusat, DKI Jakarta, Indonesia 10430)
- 13 2. Centre for Tropical Medicine and Global Health, Nuffield Department of Medicine, university of  
14 Oxford, Oxford, UK (Old Road Campus, Roosevelt Drive, Oxford, OX3 7LG, UK)
- 15 3. Department of Internal Medicine, Division of Infectious Diseases, Cipto Mangunkusumo  
16 National General Hospital, Jakarta, Indonesia (Jl. Pangeran Diponegoro No.71, Jakarta Pusat,  
17 DKI Jakarta, Indonesia 10430)
- 18 4. Faculty of Medicine, University of Indonesia, Jakarta, Indonesia (Jl. Salemba Raya No. 6,  
19 Jakarta Pusat, DKI Jakarta, Indonesia 10430)
- 20 5. Infectious Disease and Immunology Research Cluster, Indonesian Medical Education and  
21 Research Institute, Jakarta, Indonesia (Jl. Salemba Raya No.6, Jakarta Pusat, DKI Jakarta,  
22 Indonesia 10430)
- 23 6. Metropolitan Medical Centre Hospital, Jakarta, Indonesia (Jl. H. R. Rasuna Said No.1, Jakarta  
24 Selatan, DKI Jakarta, Indonesia 12940)
- 25 7. Royal Taruma Hospital, Jakarta, Indonesia (Jl. Daan Mogot No.34, Jakarta Barat, DKI Jakarta,  
26 Indonesia 11470)
- 27 8. Faculty of Medicine and Health Sciences, Atma Jaya Catholic University, Jakarta, Indonesia  
28 (Jl. Pluit Selatan Raya No.19, Jakarta Utara, DKI Jakarta, Indonesia 14440)
- 29 9. Fatmawati General Hospital, Jakarta, Indonesia (Jl. RS. Fatmawati Raya No.4, Cilandak Barat,  
30 Jakarta Selatan, DKI Jakarta, Indonesia 12430)
- 31 10. St. Carolus Hospital, Jakarta, Indonesia (Jl. Salemba Raya No. 41, Jakarta Pusat, DKI Jakarta,  
32 Indonesia 10440)
- 33 11. Prof. Dr. Sulianti Saroso Infectious Disease Hospital, Jakarta, Indonesia (Jl. Sunter Permai  
34 Raya, Jakarta Utara, DKI Jakarta, Indonesia 14340)

35  
36 **Short running title:** antibiotic use in Indonesian hospitals

37 **Inserts:** 4 tables; 3 figures

38 **Data supplement:** 10 tables

39 **Corresponding author**

40 Raph L. Hamers MD PhD

41 Address: EOCRU, Jl. Diponegoro No.69, Jakarta Pusat, DKI Jakarta, Indonesia 10430

42 Email : [raph.hamers@ndm.ox.ac.uk](mailto:raph.hamers@ndm.ox.ac.uk)

43 Phone : +62 21 31900971

44 Fax : -

45 **Synopsis**

46

47 **Background**

48 Antibiotic misuse and overuse are a major driver of antimicrobial resistance, but systematic data in  
49 Indonesia are scarce.

50 **Objectives**

51 To evaluate patterns and quality indicators of antibiotic prescribing in six acute-care hospitals in  
52 Jakarta, Indonesia.

53 **Methods**

54 We conducted a hospital-wide point prevalence survey (PPS) between March and August 2019,  
55 using Global-PPS and WHO-PPS protocols. The analysis focused on antibacterials for systemic  
56 use (antibiotics).

57 **Results**

58 Of 1602 inpatients, 993 (62.0%) received  $\geq 1$  antimicrobials. Of 1666 antimicrobial prescriptions,  
59 1273 (76.4%) were antibiotics. Most common reasons for prescribing were pneumonia (27.7%),  
60 skin and soft tissue infections (8.3%), gastrointestinal prophylaxis (7.9%), and gastrointestinal  
61 infections (5.4%). The most common indication was community-acquired infection (42.6%),  
62 followed by surgical prophylaxis (22.6%), hospital-acquired infection (18.5%), medical prophylaxis  
63 (9.6%), unknown (4.6%) and other indications (2.1%). The most prescribed antibiotic classes were  
64 third-generation cephalosporins (44.3%), fluoroquinolones (13.5%), carbapenems (7.4%),  
65 penicillins with B-lactamase inhibitor (6.8%) and aminoglycosides (6.0%). According to the WHO  
66 AWaRe classification, Watch antibiotics accounted for 67.4%, followed by 28.0% Access, 2.4%  
67 Reserve, and 2.2% Unclassified. Reason for prescribing, stop/review date and planned duration  
68 were poorly documented. Hospital antibiotic guidelines were not available for 28.1% of  
69 prescriptions, and guideline compliance was 52.2% (478/915). Parenteral administration was high  
70 (85.1%). Targeted (non-empirical) prescriptions comprised 8.1% (44/542) for community-acquired  
71 infections and 26.8% (63/235) for hospital-acquired infections.

72 **Conclusions**

73 Our data indicate a high rate of parenteral, empiric use of broad-spectrum antibiotics in Indonesian  
74 hospitals, coupled with poor documentation and guideline adherence. The findings suggest  
75 important areas for antimicrobial stewardship interventions.

76

77 **Key words**

78 Antimicrobial resistance; antibiotic use; point prevalence survey; antibiotic stewardship; quality  
79 indicators; WHO AWaRe; Indonesia

## 80 Introduction

81

82 Drug-resistant infections have been estimated to account for 700,000 deaths per year globally,  
83 cumulating to 10 million by 2050, higher than cancer (8.2 million) or diabetes (1.5 million)  
84 combined.<sup>1</sup> The overuse and misuse of antimicrobial agents has been well-recognised as one of  
85 the key drivers of emerging antimicrobial resistance (AMR),<sup>2,3</sup> with antimicrobial consumption  
86 projected to rise further globally.<sup>4</sup> In response to the emerging public health crisis of AMR, the  
87 World Health Organisation (WHO) has launched a global action plan, including strategies for  
88 surveillance and mitigation of antimicrobial overuse.<sup>5</sup>

89

90 Indonesia, a populous (271 million) and diverse middle-income country, is potentially an AMR  
91 hotspot, due to high infectious disease burdens, liberal antibiotic practices, and fragile health  
92 systems.<sup>6,7</sup> The Indonesian government is increasingly supporting antimicrobial stewardship  
93 (AMS), through the national action plan on AMR launched in 2014<sup>8,9</sup>, and as part of hospital  
94 accreditation.<sup>10</sup> However, inappropriate or unnecessary antibiotic prescribing is believed to be  
95 widespread, although systematic data are lacking to adequately inform AMS policies.

96

97 In global datasets reporting point prevalence surveys (PPS) of antibiotic use in hospitals<sup>11-12</sup>, low  
98 and middle-income countries (LMIC) remain underrepresented to date.<sup>13,14</sup> The recently introduced  
99 WHO AWaRe (Access, Watch, Reserve) antibiotic classification framework, based on accessibility  
100 versus AMR potential, is a useful metric to provide an indication of the appropriateness of  
101 antibiotic consumption.<sup>15,16</sup>

102

103 We here report the results of a hospital-wide PPS that evaluated patterns and quality indicators of  
104 antibiotic use in six acute-care, general hospitals in Jakarta, the capital city of Indonesia, for  
105 community and hospital acquired infections and medical and surgical prophylaxis, by hospital,  
106 ward type, indication and diagnosis.

## 107 **Patients and Methods**

108

### 109 **Study design and population**

110 We conducted a hospital-wide PPS of antimicrobial use in a purposive sample of six hospitals  
111 across Jakarta, between March and August 2019. We followed Global PPS (2018)<sup>17</sup> and WHO  
112 (2019)<sup>11</sup> protocols. Briefly, PPS is a “snap-shot” survey to collate medical record data on  
113 antimicrobial prescriptions in hospitalized patients. Eligible patients were all hospitalised patients  
114 who received  $\geq 1$  active antimicrobial by 8 a.m. on the survey day or surgical prophylaxis  $\leq 24$  hours  
115 prior to the survey. We excluded emergency and day-care wards, outpatient clinics, inpatients who  
116 were discharged before or admitted after 8 a.m.

117

118 The study was approved by the Research Ethics Committee of the Faculty of Medicine of the  
119 University of Indonesia (1364/UN2.F1/ETIK/2018) and the Oxford Tropical Research Ethics  
120 Committee (559-18). The requirement for individual patient consent was waived. Permission was  
121 obtained from the hospital management or research/medical committee in each participating  
122 hospital.

123

### 124 **Data collection**

125 Data collection was conducted by 1 or 2 medical doctors from the study team, joined by 1 to 4  
126 hospital staff, who received a one-day training and a data collection form (DCF) completion  
127 guideline. Each ward was completely surveyed within one day (to minimise the effect of patient  
128 movements) and all wards of a single hospital were surveyed within 4 weeks. If crucial patient data  
129 was missing, the responsible nurse or clinician was asked for clarifications. A senior team member  
130 (RL, RLH) was available to discuss any data queries and take a final decision. We developed a  
131 paper DCF comprising ward, patient and treatment sections, modified from Global-PPS<sup>17</sup> and  
132 WHO-PPS.<sup>11</sup> De-identified data were checked and entered into a study database.

133 We included systemic antimicrobials coded on the basis of the WHO Anatomical Therapeutic  
134 Chemical (ATC) classification system as follows: antibacterials (J01), antimycotics (J02),  
135 antifungals (D01BA), antimycobacterials (J04), antivirals (J05), nitroimidazole derivatives (P01AB),  
136 intestinal anti-infectives (A07A), and antimalarials (P01B). We recorded the diagnosis/reason for  
137 the prescribed antimicrobial (what the clinician aimed at treating or preventing), according to a  
138 diagnostic code list<sup>17</sup>. Antimicrobial indications were classified as: 1) community-acquired infection  
139 (CAI) if symptoms were present on admission or started  $< 48$  hours after admission; 2) hospital-  
140 acquired infection (HAI) if symptoms started  $\geq 48$  hours after admission; 3) medical prophylaxis; 4)  
141 surgical prophylaxis, categorised as single-dose, one-day, or longer than one day; 5) other; 6)  
142 unknown. We recorded the following five quality indicators of prescribing: 1) documentation of  
143 diagnosis/reason for antimicrobial use, stop/review date, and treatment duration; 2) hospital  
144 antibiotic guideline availability and compliance with regards to drug choice (if not available, this

145 item was recorded as “not assessable”); 3) parenteral administration; 4) culture sample taken in  
146 therapeutic use; 5) targeted (antibiotic prescribed in response to microbiology results) or empirical  
147 treatment.

148

## 149 **Statistical analysis**

150 We used descriptive statistics to summarise the data, expressed as counts or percentages, by  
151 hospital, ward type, indication and diagnosis. The analysis focused on antibacterials for systemic  
152 use (ATC code J01) (aka “antibiotics”). Antibiotics were reported by drug names, chemical class  
153 (according to the 4th level WHO ATC classification) and AWaRe groups. We used RStudio  
154 Version 1.3.1093 for all analyses.

155

156

## 157 **Results**

158

### 159 **Hospital characteristics**

160 Hospitals were tertiary (2) or secondary-level (4), government or private (3 each), including one  
161 specializing in infectious diseases (**Table 1**). All hospitals had an antibiotic stewardship team, five  
162 hospitals had local antibiotic guidelines, and four hospitals were included in the national health  
163 insurance scheme. All 238 inpatient wards across the six hospitals were surveyed, including 87  
164 medical, 31 surgical, 95 mixed medical-surgical wards and 25 intensive care units, of which 123  
165 adult, 51 paediatric-neonatal and 64 mixed adult-paediatric-neonatal. On the survey day, a total of  
166 2358 active hospital beds (median 230, range 134-853 per hospital) accounted for 1602 (67.9%)  
167 admitted patients (median 149, range 51-625 per hospital), of whom 993 (62.0%) received  $\geq 1$   
168 antimicrobials (median 91, range 33-368 per hospital). The proportion of patients receiving one or  
169 more antimicrobials ranged from 53.5% to 78.8% across hospitals (**Table 1 and S1**).

170

### 171 **Characteristics of patients receiving one or more antimicrobials**

172 **Table 2** summarizes patient characteristics. Of 993 patients, 497 (50.1%) were women and 782  
173 (78.8%) were adults, and the median age was 43 years (IQR 22-58.5; range 1 day to 99 years).  
174 One or more comorbidities were documented in 48.9% (486) of patients. 368 (37.1%) had  
175 undergone surgery and 299 (30.1%) had been hospitalised in the last 90 days, and 145 (14.6%)  
176 had been transferred from another hospital.

177

178 The 993 patients receiving one or more antimicrobials accounted for a total of 1666 active  
179 antimicrobial prescriptions (median 1 per patient, range 1-12), with 60.6% (602) receiving one  
180 antimicrobial agent, 25.6% (254) two, and 13.8% (137) three or more. Antimicrobial use was  
181 highest in ICU (86.8%, 132/152), followed by surgical wards (66.0%, 184/293), mixed medical-  
182 surgical wards (65.0%, 401/622) and medical wards (51.4%, 310/569) (**Table S1**). Concomitant

183 use of  $\geq 2$  antimicrobials was more frequent in ICU (59.1%, 58/98) than non-ICU (37.2%, 333/895)  
184 (**Table 2**).

185

### 186 **Antimicrobial agents prescribed**

187 Of all 1666 antimicrobial prescriptions, 76.4% (1273) were antibacterials, followed by 11.4% (197)  
188 antimycobacterials, 4.3% (72) antivirals, 3.7% (62) antimycotics, 2.6% (43) intestinal antiinfectives,  
189 0.8% (13) antimalarials, and 0.4% (6) nitroimidazole derivatives. The 1273 prescribed antibiotics  
190 (J01) included 46 different agents. The five most prescribed antibiotics were ceftriaxone (26.8%,  
191 341), levofloxacin (10.7%, 137), metronidazole (7.1%, 91), meropenem (6.4%, 82) and cefotaxime  
192 (5.6%, 71) –accounting for 56.5% (720) of prescriptions (**Table S2**). The five most prescribed  
193 antibiotic classes were third-generation cephalosporins (44.3%, 565), fluoroquinolones (13.5%,  
194 172), carbapenems (7.4%, 94), penicillins with B-lactamase inhibitor (6.8%, 86) and  
195 aminoglycosides (6.0%, 76) (**Figure 1**) –accounting for 78.0% (993) of prescriptions.

196

### 197 **Reasons for antibiotic prescribing**

198 The full list of diagnosis/reasons for all 1666 antimicrobial prescriptions is included in the data  
199 supplement (**Table S3**). Among all 1273 antibiotic prescriptions (J01), the most common  
200 diagnosis/reasons were pneumonia (27.7%, 353), skin and soft tissue infections (8.3%, 106),  
201 gastrointestinal prophylaxis (7.9%, 101), and gastrointestinal infections (5.4%, 69) –accounting for  
202 49.4% (629) of all prescriptions (**Table 3** and **S4**). Ceftriaxone and levofloxacin were mainly used  
203 to treat pneumonia and gastrointestinal infections. Metronidazole was mainly used for skin and soft  
204 tissue infections and intra-abdominal infections, and for gastrointestinal prophylaxis. Meropenem  
205 was mainly used for pneumonia and sepsis. Cefotaxime was mainly used for pneumonia and for  
206 gastrointestinal prophylaxis.

207

### 208 **Indications for antibiotic prescribing**

209 Among all 1273 antibiotic prescriptions (J01), the most common indication was CAI (42.6%, 542),  
210 followed by surgical prophylaxis (22.6%, 288), HAI (18.5%, 235), medical prophylaxis (9.6%, 122),  
211 unknown (4.6%, 59), and other (2.1%, 27) (**Table S5**)

212

213 Among CAI (542), the top-5 diagnosis/reasons were pneumonia (42.6%, 231), skin and soft tissue  
214 infection (14.2%, 77), gastrointestinal infection (12.2%, 66), sepsis (5.5%, 30), and intra-abdominal  
215 infection (5.4%, 29) (**Table S4**). The five most common antibiotics for CAI were ceftriaxone  
216 (32.8%, 178), levofloxacin (13.5%, 73), metronidazole (8.1%, 44), meropenem (7.7%, 42), and  
217 ampicillin sulbactam (5.4%, 29) –accounting for 67.5% (366) of prescriptions (**Table S6**).

218

219 The most common HAI was hospital-acquired pneumonia (including other HAI) (70.2%, 165),  
220 followed by intervention-related infections (including catheter-related blood stream infection,



221 ventilator-associated pneumonia, catheter-related urinary tract infection) (19%, 35), post-operative  
222 surgical site infection (13.6%, 32), infection present on admission from another hospital (0.85%, 2)  
223 or long-term care facility (0.4%, 1); no *C. difficile*-associated diarrhoea (HAI3) was documented  
224 (**Table S7**). The six most common antibiotics for HAI were levofloxacin (18.7%, 44), meropenem  
225 (13.6%, 32), ceftriaxone (9.8%, 23), amikacin (6.4%, 15), metronidazole and ceftazidime (6%, 14  
226 each) –accounting for 60.4% (142) of prescriptions (**Table S6**).

227

228 Among medical prophylaxis (122), the top-5 diagnosis/reasons were neonatal (20.5%, 25), general  
229 (19.7%, 24), gastrointestinal (17.2%, 21), respiratory (15.6%, 19), and unknown (8.2%, 10) (**Table**  
230 **S4**). The five most common antibiotics for medical prophylaxis were ceftriaxone (28.7%, 35),  
231 cotrimoxazole (17.2%, 21), gentamicin (10.7%, 13), cefotaxime (8.2%, 10), ampicillin (7.4%, 9) –  
232 accounting for 72.1% (88) of prescriptions (**Table S6**).

233

234 Among surgical prophylaxis (288), the top-5 diagnosis/reasons were gastrointestinal (27.8%, 80),  
235 obstetrics/gynaecology (20.1%, 58), bone and joint (17%, 49), urinary tract (12.8%, 37), central  
236 nervous system and ear-nose-throat (7.3%, 21 each). The most common antibiotics for surgical  
237 prophylaxis were ceftriaxone (26.4%, 76), cefixime (11.5%, 33), cefoperazone (11.1%, 32),  
238 metronidazole (9.7%, 28), cefazolin (6.2%, 18) –accounting for 64.9% (187) of prescriptions.  
239 Notably, duration of surgical prophylaxis was longer than one day for 76% (219) of prescriptions,  
240 whereas 15.0% (43) was single-dose and 9.0% (26) was for one day.

241

#### 242 **Antibiotic use based on AWaRe groups**

243 **Figure 2** summarizes AWaRe groups. Of all 1273 antibiotic prescriptions (J01), 67.4% (858) were  
244 Watch antibiotics, followed by 28.0% (356) Access, 2.4% (31) Reserve, and 2.2% (28)  
245 Unclassified. This pattern was similar across indications and ward types. Of note, Watch  
246 antibiotics were commonly prescribed for the most frequent diagnosis, i.e. pneumonia (34.4%,  
247 295), gastrointestinal infection (6.6%, 57), and skin and soft tissue infection (5.8%, 50). Watch  
248 antibiotics (858) comprised 45.1% (387) of CAI, 20.9% (179) of surgical prophylaxis, 19.5% (167)  
249 of HAI, and 7.2% (62) of medical prophylaxis. The five most used Watch antibiotics were  
250 ceftriaxone (39.7%, 341), levofloxacin (15.8%, 136), meropenem (9.6%, 82), cefotaxime (8.3%,  
251 71), and cefoperazone (6%, 52) (**Table S7**).

252

253 Access antibiotics (356) comprised 37.6% (134) of CAI, 27% (96) of surgical prophylaxis, 15.4%  
254 (55) of medical prophylaxis, and 13.8% (49) of HAI. The five most used Access antibiotics were  
255 metronidazole (25.3%, 90), ampicillin-sulbactam (12.4%, 44), gentamicin (11.8%, 42), amikacin  
256 (9%, 32) and amoxicillin-clavulanic acid (8.7%, 31) (**Table S7, Figure 3**).

257



258 Reserve antibiotics were uncommon (31), and included fosfomycin (15, 48.4%), tigecycline (13,  
259 41.9%), colistin (1, 3.2%), and linezolid (1, 3.2%).

260

#### 261 **Quality indicators of antibiotic use (J01)**

262 **Documentation of antibiotic plan** Reason for prescribing was documented for 63.5% (808/1273)  
263 of all prescriptions, with substantial variation between hospitals, indications and ward types (**Table**  
264 **4 and S9**). Documentation of diagnosis/reason was better for therapeutic use (546/777, 70.3%)  
265 than prophylactic use (230/410, 56.0%), and in ICU (75.6%, 118/156) than non-ICU (61.8%,  
266 690/1117). Stop/review date (15.2%, 194/1273) and planned treatment duration (9.8%, 125/1273)  
267 was poorly documented overall, across indications and ward types (**Table 4 and S9**).

268

269 **Hospital guideline availability and compliance** Local antibiotic guidelines were not available for  
270 28.1% (358/1273) of antibiotic prescriptions; and, of note, for 76.2% (93/122) of prescriptions for  
271 medical prophylaxis. Guideline compliance was 52.2% (478/915) overall, 44.8% (223/498) for  
272 empirical CAI treatment, 45.9% (79/172) for empirical HAI treatment, 28.5% (82/288) for surgical  
273 prophylaxis and 18.9% (23/122) for medical prophylaxis (**Table 4**). Guideline compliance was  
274 similar across ward types (**Table S9**).

275

276 **Parenteral use** 85.1% (1084/1273) of prescriptions were parenterally administered, including  
277 88.5% (208/235) for HAI, 89.5% (486/542) for CAI, 75.4% (92/122) for medical prophylaxis and  
278 82.3% (237/288) for surgical prophylaxis (**Table 4**). Parenteral use was higher in ICU (97.4%,  
279 152/156) than non-ICU (83.4%, 932/1117) (**Table S9**).

280

281 **Culture samples taken** Among 619 patients with  $\geq 1$  antibiotic for therapeutic use, 48.8% (302)  
282 had one or more samples taken for bacterial culture (total 831 samples, median 2, range 1-25 per  
283 patient). Among the top-5 diagnosis/reasons for prescribing, one or more culture sample were  
284 taken in 44.8% (154/353) of pneumonias, 51.9% (55/106) of skin and soft tissue infections, 66.7%  
285 (38/57) of intra-abdominal infections, 52.2% (24/46) of sepsis, and 75.9% (22/29) of upper UTI.  
286 Blood cultures were taken in 44.4% (88/353) of pneumonias, 45.6% (26/57) of intra-abdominal  
287 infections, 58.6% (17/29) of upper UTI, and 95.8% (23/24) of sepsis. Sputum cultures were taken  
288 in 26.9% (95/353) of pneumonias. Urine cultures were taken in 72.4% (21/29) of upper UTI (**Table**  
289 **S10**).

290

291 **Targeted antibiotic treatment** Treatment was targeted in 8.1% (44/542) of CAI and 26.8%  
292 (63/235) of HAI (**Table 4**); 13.0% (46/353) of pneumonias, 15.8% (9/57) of intra-abdominal  
293 infections, 44.8% (13/29) of upper UTI, and 13% (6/46) of sepsis. Targeted treatment was more  
294 common in ICU (19.9%, 31/156) than in non-ICU (6.8%, 76/1117) (**Table S9**).

## 295 Discussion

296

297 This was the first contemporary hospital-wide survey in Indonesia that systematically evaluated  
298 patterns and quality of antibiotic prescribing, using the recommended PPS methodology.<sup>11,17</sup> We  
299 demonstrated the feasibility of PPS in this low-resource setting, and generated useful data to  
300 guide local AMS programmes. Our survey found a high proportion (62%) of antimicrobial use  
301 among hospitalized patients, ranging from 53.5% to 78.8% across hospitals in Jakarta, with the  
302 highest use in ICU (86.8%) as expected. Antibiotic use was substantially higher than reported in  
303 global PPS datasets, which were dominated by data from high-income countries in Europe, North  
304 America and Asia<sup>13,14</sup> and which highlighted that antimicrobial use was significantly higher in non-  
305 European hospitals compared with European hospitals.<sup>14</sup>

306

307 Consistent with other surveys in Asia<sup>18,19</sup> and globally<sup>13</sup>, the predominant reason for antibiotic  
308 prescription in Jakarta hospitals were lower respiratory tract infections. In our survey, the mostly  
309 used antibiotic classes were third-generation cephalosporines (mainly ceftriaxone),  
310 fluoroquinolones (mainly levofloxacin), and carbapenems (mainly meropenem), all predominantly  
311 used for pneumonia, among several other diagnosis. Ceftriaxone was the most used antibiotic  
312 across all major indications (i.e. CAI, HAI, surgical and medical prophylaxis). These findings are  
313 consistent with the widespread use of broad-spectrum antibiotics, predominantly third-generation  
314 cephalosporins and fluoroquinolones, in Indonesia<sup>20</sup>, other Asian countries<sup>18,19,21-23</sup> and  
315 globally<sup>13,14</sup>, which may suggest that at least a proportion of these prescriptions are unnecessary  
316 or inappropriate. Moreover, the empirical use of meropenem for CAI and HAI represented nearly  
317 10% of all antibiotics for therapeutic use. This could partially be explained by high rates of AMR,  
318 particularly in common Gram-negative organisms, in Indonesian hospitals.<sup>24</sup> However, targeted  
319 prescribing for CAI (8%) and HAI (27%) was low in comparison to a global study (12-27% and 20-  
320 44%, respectively)<sup>13</sup>, suggesting underutilization of microbiological diagnostics as well as overuse  
321 of broad-spectrum antibiotics.

322

323 Antibiotic prescriptions for HAI (18.5% of total), predominantly for pneumonia but also intervention-  
324 related and post-operative surgical site infections, were comparable to recent surveys in India  
325 (19%)<sup>19</sup> and Thailand (34%)<sup>18</sup>, but considerably higher than in reports from high-income settings,  
326 e.g. ECDC survey (6%)<sup>25</sup> and the GLOBAL-PPS survey (8.4%).<sup>13</sup> These data confirm the  
327 significantly higher burden of HAI in LMIC compared to high-income countries.

328

329 A high proportion of antibiotic prescriptions were for surgical (23%) and medical prophylaxis  
330 (10%), for a range of indications. Prophylactic prescribing was unusually high for gastrointestinal  
331 infections. Prolonged (>1 day) surgical prophylaxis was very common (76%) in our survey, as has

332 also been observed in other countries in Asia (Pakistan 97%<sup>21</sup>, India 77%<sup>19</sup>, Thailand 90%<sup>18</sup>) as  
333 well as in Europe<sup>13,25</sup>. Prolonged antibiotic prophylaxis for more than 24h for most surgical  
334 indications does not prevent development of postoperative infections, compared with <24h, but  
335 increases the risk of AMR and side-effects.<sup>26</sup> Further research is warranted to explain the reasons  
336 for these patterns.

337

338 We investigated five basic quality indicators, which could be used to set benchmarks for quality  
339 improvement of antibiotic use<sup>27</sup> and AMS programmes.<sup>28</sup> Documentation of the reason of  
340 prescribing (64%) was lower than reported across studies in Europe, Asia, Africa, and America  
341 (70-85%).<sup>13,29</sup> Stop or review date was poorly documented (15%) across indications and ward  
342 types. Post-prescription review of a prescribed antimicrobial within 48-72h of the initial order,  
343 ensures appropriate choice and route of administration, optimal de-escalation (IV-oral switch)  
344 practices, and prevents unnecessarily long antibiotic courses. The high (85%) proportion of  
345 parenteral route of administration, coupled with high rates of empirical therapy and suboptimal use  
346 of microbiological cultures, suggests lack of de-escalation protocols in the participating hospitals.  
347 Pro-active IV to oral switching policies can reduce catheter-related complications, health-care  
348 costs, and duration of hospital stays, and is recognized as a key metric for AMS processes<sup>30</sup>.

349

350 Hospital guidelines were not available for 28% of antibiotic prescriptions, including for 76% of  
351 prescriptions for medical prophylaxis. A systematic review and meta-analysis showed that  
352 guideline-adherent empirical therapy was associated with a relative risk reduction for mortality of  
353 35%<sup>30</sup>. The reason for poor guideline compliance is uncertain and probably multifactorial, including  
354 local resistance patterns, ineffective guideline dissemination, and clinical uncertainty with fear of  
355 treatment failure. Our findings should trigger further detailed investigations at hospital and country  
356 level.

357

358 The WHO AWaRe framework offers an attractive metric for LMIC in the absence of validated  
359 quality indicators for antibiotic appropriateness<sup>15,31,32</sup>, and includes a >60% national target of total  
360 antibiotic consumption in the Access category by 2023<sup>33</sup>. However, a recent assessment of  
361 antibiotic consumption data from 76 countries in 2000-2015 found that the global per-capita  
362 consumption of Watch antibiotics increased by 90.9%, compared with an increase of 26.2% in  
363 Access antibiotics, with disproportionate increases in Watch antibiotic consumption in LMIC (165%  
364 compared with 27.9% in high-income countries)<sup>16</sup>. Although Indonesia national-level data have not  
365 been included in the AWaRE reports to date<sup>33</sup>, our survey found hospital consumption of Access  
366 antibiotics at 28% to be far below the 60% target, mostly driven by ceftriaxone and levofloxacin  
367 use for CAI and HAI. Although these findings could partially be explained by the national health  
368 insurance scheme which determines available antibiotics based on the national formulary<sup>34</sup>, they  
369 also highlight significant challenges for AMS.

370

371 The limitations of this study are inherent to the cross-sectional “snap-shot” design. As we used a  
372 convenient hospital sample, data are not representative for all hospitals in Jakarta or Indonesia,  
373 urging caution in extrapolating the observed patterns. Antibiotic use patterns can be influenced by  
374 many factors, e.g. patient case mix, prevalence of different types of infections, AMR patterns,  
375 institutional factors, among others.

376

377 In conclusion, we observed high levels of parenteral, empiric use of broad-spectrum antibiotics in  
378 Indonesian hospitals, and inadequate performance on key quality indicators of prescribing. Despite  
379 important progress in AMS, supported by national policies<sup>9,10</sup> and guidelines<sup>35</sup>, the study findings  
380 highlighted the need to strengthen AMS to increase use of narrower-spectrum antibiotics through  
381 culture-guided targeted treatment and hospital guideline compliance. Further research is needed  
382 to understand the complex drivers of antibiotic prescribing, and to develop context-specific and  
383 feasible quality improvement strategies to strengthen existing AMS programmes.

384 **Acknowledgements**

385 We thank the management, research/medical committees and clinical staff of the participating  
386 hospitals for their support, and Reinout van Crevel and Rogier van Doorn for useful feedback on  
387 the manuscript.

388

389 **EXPLAIN study group**

390 Ralalicia Limato, Erni J. Nelwan, Manzilina Mudia, Helio Guterres, Enty Enty, Ifael Y. Mauleti,  
391 Maria Mayasari, Iman Firmansyah, May Hizrani, Raph L. Hamers, Anis Karuniawati, Prof Taralan  
392 Tambunan, Prof Amin Soebandrio, Prof Henri Verbrugh, Decy Subekti, Iqbal Elyazar, Mutia  
393 Rahardjani, Fitria Wulandari, Prof Reinout van Crevel, Rogier van Doorn, Vu Thi Lan Huong, Nga  
394 Do Ti Thuy, Sonia Lewycka, Prof Alex Broom.

395

396 **Funding**

397 This work was funded by the Wellcome Trust, UK (106680/Z/14/Z)

398

399 **Transparency declarations**

400 Conflicts of interest: The authors declare no competing interests.

401 Author contributions: EJM and RLH conceived the idea for the study and are the principal  
402 investigators. RLH obtained the funding. RL, EJM and RLH designed the study protocol. MM, HG,  
403 EE, IYM, MM, IF, and MH collected and verified the data, overseen by RL. RL and MM curated the  
404 database, did the analysis and had full access to all study data, supervised by EJM and RLH. RL,  
405 MM and RLH drafted the paper. All authors critically revised the manuscript and all authors gave  
406 approval for the final version to be published.

407 **References**

- 408 1. O'Neill J. Antimicrobial Resistance: Tackling a Crisis for the Health and Wealth of Nations. *AMR*  
409 *Rev Pap* 2014.
- 410 2. Van Boeckel TP, Gandra S, Ashok A, *et al.* Global antibiotic consumption 2000 to 2010: An  
411 analysis of national pharmaceutical sales data. *Lancet Infect Dis* 2014; **14**: 742–50. Available at:  
412 [http://dx.doi.org/10.1016/S1473-3099\(14\)70780-7](http://dx.doi.org/10.1016/S1473-3099(14)70780-7).
- 413 3. Goossens H, Ferech M, Vander Stichele R, Elseviers M. Outpatient antibiotic use in Europe and  
414 association with resistance: a cross-national database study. *Lancet* 2005; **365**: 579–87.
- 415 4. Klein EY, Van Boeckel TP, Martinez EM, *et al.* Global increase and geographic convergence in  
416 antibiotic consumption between 2000 and 2015. *Proc Natl Acad Sci U S A* 2018; **115**: E3463–70.
- 417 5. World Health Organization (WHO). *Global Action Plan on Antimicrobial Resistance*. 2015.
- 418 6. Zellweger M, Carrique-mas J, Limmathurotsakul D, Day NPJ, Thwaites GE. A current  
419 perspective on antimicrobial resistance in Southeast Asia. *J Antimicrob Chemother* 2017; **72**:  
420 2963–72. Available at: <https://www.ncbi.nlm.nih.gov/pmc/articles/PMC5890732/pdf/dkx260.pdf>.
- 421 7. Coker RJ, Hunter BM, Rudge JW, Liverani M, Hanvoravongchai P. Emerging infectious  
422 diseases in southeast Asia: Regional challenges to control. *Lancet* 2011; **377**: 599–609. Available  
423 at: [http://dx.doi.org/10.1016/S0140-6736\(10\)62004-1](http://dx.doi.org/10.1016/S0140-6736(10)62004-1).
- 424 8. Parathon H, Kuntaman K, Widiastoety TH, *et al.* Progress towards antimicrobial resistance  
425 containment and control in Indonesia. *BMJ* 2017; **358**: 31–5.
- 426 9. Ministry of Health Republic of Indonesia. Minister of Health Republic of Indonesia Policy No. 8  
427 Year 2015. 2015.
- 428 10. Hospital Accreditation Committee. Standard Hospital Accreditation 1st Edition. *Komisi*  
429 *Akreditasi Rumah Sakit* 2017: 1–421. Available at: [http://akreditasi.kars.or.id/downloads/RS-](http://akreditasi.kars.or.id/downloads/RS-Template.xls)  
430 [Template.xls](http://akreditasi.kars.or.id/downloads/RS-Template.xls).
- 431 11. World Health Organization (WHO). *WHO Methodology for Point Prevalence Survey on*  
432 *Antibiotic Use in Hospitals Version 1.1*. 2018. Available at:  
433 <https://apps.who.int/iris/bitstream/handle/10665/280063/WHO-EMP-IAU-2018.01-eng.pdf?ua=1>.
- 434 12. Versporten A, Bielicki J, Drapier N, *et al.* The worldwide antibiotic resistance and prescribing in  
435 european children (ARPEC) point prevalence survey: Developing hospital-quality indicators of  
436 antibiotic prescribing for children. *J Antimicrob Chemother* 2016; **71**: 1106–17.
- 437 13. Versporten A, Zarb P, Caniaux I, *et al.* Antimicrobial consumption and resistance in adult  
438 hospital inpatients in 53 countries: results of an internet-based global point prevalence survey.  
439 *Lancet Glob Heal* 2018; **6**: e619–29. Available at: [http://dx.doi.org/10.1016/%0AS2214-](http://dx.doi.org/10.1016/%0AS2214-109X(18)30186-4)  
440 [109X\(18\)30186-4](http://dx.doi.org/10.1016/%0AS2214-109X(18)30186-4).
- 441 14. Saleem Z, Hassali MA, Godman B, *et al.* Point prevalence surveys of antimicrobial use: a  
442 systematic review and the implications. *Expert Rev Anti Infect Ther* 2020; **0**: 1. Available at:  
443 <https://doi.org/10.1080/14787210.2020.1767593>.
- 444 15. World Health Organization (WHO). WHO releases the 2019 AWaRe Classification Antibiotics.



- 445 2019. Available at:  
446 [https://www.who.int/medicines/news/2019/WHO\\_releases2019AWaRe\\_classification\\_antibiotics/e](https://www.who.int/medicines/news/2019/WHO_releases2019AWaRe_classification_antibiotics/en/)  
447 [n/](https://www.who.int/medicines/news/2019/WHO_releases2019AWaRe_classification_antibiotics/en/).
- 448 16. Klein EY, Milkowska-Shibata M, Tseng KK, *et al.* Assessment of WHO antibiotic consumption  
449 and access targets in 76 countries, 2000–15: an analysis of pharmaceutical sales data. *Lancet*  
450 *Infect Dis* 2020; **3099**. Available at: [http://dx.doi.org/10.1016/S1473-3099\(20\)30332-7](http://dx.doi.org/10.1016/S1473-3099(20)30332-7).
- 451 17. Goossens H. *Global Point Prevalence Survey of Antimicrobial Consumption and Resistance*  
452 *(2018 Global-PPS): Protocol*. 2018.
- 453 18. Thamlikitkul V, Rattanaumpawan P, Sirijatuphat R, Wangchinda W. Integrated one-day  
454 surveillance of antimicrobial use, antimicrobial consumption, antimicrobial resistance, healthcare-  
455 associated infection, and antimicrobial resistance burden among hospitalized patients in Thailand.  
456 *J Infect* 2020; **81**: 98–106. Available at: <https://doi.org/10.1016/j.jinf.2020.04.040>.
- 457 19. Singh SK, Sengupta S, Antony R, *et al.* Variations in antibiotic use across India: multi-centre  
458 study through Global Point Prevalence survey. *J Hosp Infect* 2019; **103**: 280–3. Available at:  
459 <https://doi.org/10.1016/j.jhin.2019.05.014>.
- 460 20. Hadi U, Kuntaman K, Qiptiyah M, Paraton H. Problem of Antibiotic Use and Antimicrobial  
461 Resistance in Indonesia: Are We Really Making Progress? *Indones J Trop Infect Dis* 2013; **4**: 5.
- 462 21. Saleem Z, Hassali MA, Versporten A, *et al.* A multicenter point prevalence survey of antibiotic  
463 use in Punjab, Pakistan: findings and implications. *Expert Rev Anti Infect Ther* 2019; **17**: 285–93.  
464 Available at: <https://doi.org/10.1080/14787210.2019.1581063>.
- 465 22. Xie D shuang, Xiang L li, Li R, Hu Q, Luo Q qin, Xiong W. A multicenter point-prevalence  
466 survey of antibiotic use in 13 Chinese hospitals. *J Infect Public Health* 2015; **8**: 55–61. Available  
467 at: <http://dx.doi.org/10.1016/j.jiph.2014.07.001>.
- 468 23. Thu TA, Rahman M, Coffin S, Harun-Or-Rashid M, Sakamoto J, Hung NV. Antibiotic use in  
469 Vietnamese hospitals: A multicenter point-prevalence study. *Am J Infect Control* 2012; **40**: 840–4.
- 470 24. Dahesihdewi A, Sugjani AK, Parwati I. *Data Surveilans Mikroba Dan Kepekaannya Terhadap*  
471 *Antibiotik Berdasarkan Tipe Rumah Sakit Di Indonesia Tahun 2017*. Jakarta, Indonesia; 2018.
- 472 25. European Centre for Disease Prevention and Control. *Point prevalence survey of healthcare-*  
473 *associated infections and antimicrobial use in European acute care hospitals*. Stockholm; 2013.
- 474 26. World Health Organization (WHO). *Global guidelines on the prevention of surgical site*  
475 *infection*. Geneva, Switzerland; 2018. Available at: [http://www.who.int/gpsc/ssi-prevention-](http://www.who.int/gpsc/ssi-prevention-guidelines/en/#.WB6CWivkT70.mendeley)  
476 [guidelines/en/#.WB6CWivkT70.mendeley](http://www.who.int/gpsc/ssi-prevention-guidelines/en/#.WB6CWivkT70.mendeley).
- 477 27. van den Bosch CMA, Hulscher MEJL, Natsch S, Wille J, Prins JM, Geerlings SE. Applicability  
478 of generic quality indicators for appropriate antibiotic use in daily hospital practice: a cross-  
479 sectional point-prevalence multicenter study. *Clin Microbiol Infect* 2016; **22**: 888.e1-888.e9.  
480 Available at: <http://dx.doi.org/10.1016/j.cmi.2016.07.011>.
- 481 28. Malcolm W, Nathwani D, Davey P, *et al.* From intermittent antibiotic point prevalence surveys  
482 to quality improvement: Experience in Scottish hospitals. *Antimicrob Resist Infect Control* 2013; **2**:



- 483 1–9.
- 484 29. Zarb P, Amadeo B, Muller A, *et al.* Identification of targets for quality improvement in  
485 antimicrobial prescribing: The web-based ESAC point prevalence survey 2009. *J Antimicrob*  
486 *Chemother* 2011; **66**: 443–9.
- 487 30. Schuts EC, Hulscher MEJL, Mouton JW, *et al.* Current evidence on hospital antimicrobial  
488 stewardship objectives: A systematic review and meta-analysis. *Lancet Infect Dis* 2016; **16**: 847–  
489 56. Available at: [http://dx.doi.org/10.1016/S1473-3099\(16\)00065-7](http://dx.doi.org/10.1016/S1473-3099(16)00065-7).
- 490 31. World Health Organization (WHO). Adopt AWaRe: Handle antibiotics with care. 2019.  
491 Available at: <https://adoptaware.org/>.
- 492 32. Sharland M, Pulcini C, Harbarth S, *et al.* Classifying antibiotics in the WHO Essential  
493 Medicines List for optimal use—be AWaRe. *Lancet Infect Dis* 2018; **18**: 18–20. Available at:  
494 [http://dx.doi.org/10.1016/S1473-3099\(17\)30724-7](http://dx.doi.org/10.1016/S1473-3099(17)30724-7).
- 495 33. World Health Organization (WHO). *WHO report on surveillance of antibiotic consumption:  
496 2016-2018 early implementation*. Geneva, Switzerland; 2018. Available at:  
497 <https://apps.who.int/iris/bitstream/handle/10665/277359/9789241514880-eng.pdf>.
- 498 34. Yuniarti E, Prabandari YS, Kristin E, Suryawati S. Rationing for medicines by health care  
499 providers in Indonesia National Health Insurance System at hospital setting: A qualitative study. *J*  
500 *Pharm Policy Pract* 2019; **12**: 1–11.
- 501 35. Ministry of Health Republic of Indonesia. Minister of Health Policy on General Guideline of  
502 Antibiotic Use. 2011. Available at:  
503 [https://www.google.co.id/url?sa=t&rct=j&q=&esrc=s&source=web&cd=2&cad=rja&uact=8&ved=0a](https://www.google.co.id/url?sa=t&rct=j&q=&esrc=s&source=web&cd=2&cad=rja&uact=8&ved=0ahUKEwjEh8GnxurXAhVMNI8KHVx6DooQFggzMAE&url=http%3A%2F%2Fjdih.pom.go.id%2Fsho)  
504 [http%3A%2F%2Fjdih.pom.go.id%2Fsho](http://jdih.pom.go.id/sho)  
505 [wpdf.php%3Fu%3DcTc0eStSVTImXC7Av%252BxK5RLEij8it%252Fhu%252FnLT03HCOs%253](http://jdih.pom.go.id/sho)  
506 [D&usg=AOvVaw34g7pV](http://jdih.pom.go.id/sho).
- 507

**Table 1. Hospital characteristics**

|                                                   | Total       | Hospital 1 | Hospital 2 | Hospital 3 | Hospital 4 | Hospital 5 | Hospital 6 |
|---------------------------------------------------|-------------|------------|------------|------------|------------|------------|------------|
| Level of health service                           | -           | Secondary  | Tertiary   | Secondary  | Secondary  | Tertiary   | Secondary  |
| Sector                                            | -           | Private    | Public     | Private    | Public     | Public     | Private    |
| Teaching hospital                                 | -           | Yes        | Yes        | Yes        | No         | Yes        | No         |
| National health insurance scheme <sup>a</sup>     | -           | No         | Yes        | Yes        | Yes        | Yes        | No         |
| Hospital antibiotic guidelines                    | -           | No         | Yes        | Yes        | Yes        | Yes        | Yes        |
| Inpatient wards <sup>b</sup>                      | 238         | 19         | 74         | 30         | 14         | 79         | 22         |
| Medical wards                                     | 87          | 4          | 27         | 15         | 6          | 30         | 5          |
| Surgical wards                                    | 31          | 0          | 17         | 2          | 0          | 11         | 1          |
| Mixed medical-surgical wards <sup>c</sup>         | 95          | 12         | 19         | 10         | 7          | 32         | 15         |
| Intensive care units                              | 25          | 3          | 11         | 3          | 1          | 6          | 1          |
| Adult                                             | 123         | 8          | 55         | 13         | 2          | 39         | 6          |
| Paediatric and/or neonatal                        | 51          | 5          | 12         | 6          | 3          | 21         | 4          |
| Mixed adult-neonatal-paediatric <sup>d</sup>      | 64          | 6          | 7          | 11         | 9          | 19         | 12         |
| Inpatient beds                                    | 2358        | 159        | 767        | 300        | 145        | 853        | 134        |
| Admitted patients                                 | 1602 (67.9) | 100 (62.9) | 562 (73.3) | 198 (66.0) | 66 (45.5)  | 625 (73.3) | 51 (38.1)  |
| Admitted patients on ≥1 antimicrobials            | 993 (62.0)  | 75 (75.0)  | 368 (65.5) | 106 (53.5) | 52 (78.8)  | 359 (57.4) | 33 (64.7)  |
| Medical ward                                      | 310 (31.2)  | 47 (62.7)  | 102 (27.7) | 45 (42.5)  | 14 (26.9)  | 95 (26.5)  | 7 (21.2)   |
| Surgical ward                                     | 184 (18.5)  | 0 (0.0)    | 87 (23.6)  | 24 (22.6)  | 0 (0.0)    | 73 (20.3)  | 0 (0.0)    |
| Mixed medical-surgical ward <sup>c</sup>          | 401 (40.4)  | 23 (30.7)  | 135 (36.7) | 37 (34.9)  | 35 (67.3)  | 147 (40.9) | 24 (72.7)  |
| Intensive care unit                               | 98 (9.9)    | 5 (6.7)    | 44 (12.0)  | 0 (0.0)    | 3 (5.8)    | 44 (12.3)  | 2 (6.1)    |
| Adult ward                                        | 727 (73.2)  | 31 (41.3)  | 298 (81.0) | 92 (86.8)  | 43 (82.7)  | 230 (64.0) | 33 (100)   |
| Paediatric ward                                   | 163 (16.4)  | 13 (17.4)  | 58 (15.7)  | 8 (7.5)    | 3 (5.7)    | 81 (22.6)  | 0 (0.0)    |
| Mixed adult-neonatal-paediatric ward <sup>d</sup> | 103 (10.4)  | 31 (41.3)  | 12 (3.3)   | 6 (5.7)    | 6 (11.6)   | 48 (13.4)  | 0 (0.0)    |

Data shown reflect the hospital situation on the survey day, and are expressed as number (percentage), unless otherwise specified.

<sup>a</sup> National health insurance scheme, *Jaminan Kesehatan Nasional (JKN)*.

<sup>b</sup> Includes all inpatients wards in the hospital. Some wards have been further subdivided for the purpose of this survey.

<sup>c</sup> Wards that can admit both medical and surgical patients.

<sup>d</sup> Wards that can admit both adult, paediatric and neonatal patients.

**Table 2. Characteristics of patients receiving  $\geq 1$  antimicrobials**

|                                               | Total<br>(n=993) | Hospital 1<br>(n=75) | Hospital 2<br>(n=368) | Hospital 3<br>(n=106) | Hospital 4<br>(n=52) | Hospital 5<br>(n=359) | Hospital 6<br>(n=33) |
|-----------------------------------------------|------------------|----------------------|-----------------------|-----------------------|----------------------|-----------------------|----------------------|
| Female                                        | 497 (50.1)       | 41 (54.7)            | 186 (50.5)            | 61 (57.5)             | 22 (42.3)            | 175 (48.7)            | 12 (36.4)            |
| Age (median, IQR) <sup>a</sup>                | 43 (22-58.5)     | 29 (20-55)           | 47 (25-60)            | 52 (33-66)            | 39.5 (28-59)         | 37 (8-53)             | 51 (28.5-65)         |
| <1 month (neonates)                           | 45 (4.5)         | 2 (2.7)              | 17 (4.6)              | 2 (1.9)               | 1 (1.9)              | 23 (6.4)              | 0 (0.0)              |
| 1-23 months                                   | 63 (6.3)         | 3 (4.0)              | 20 (5.4)              | 2 (1.9)               | 1 (1.9)              | 37 (10.3)             | 0 (0.0)              |
| 2-17 years                                    | 103 (10.4)       | 12 (16.0)            | 24 (6.5)              | 6 (5.7)               | 4 (7.7)              | 57 (15.9)             | 0 (0.0)              |
| 18-29 years                                   | 131 (13.2)       | 21 (28.0)            | 47 (12.8)             | 7 (6.6)               | 8 (15.4)             | 39 (10.9)             | 9 (27.3)             |
| 30-39 years                                   | 112 (11.3)       | 9 (12.0)             | 35 (9.5)              | 24 (22.6)             | 12 (23.1)            | 30 (8.4)              | 2 (6.1)              |
| 40-49 years                                   | 145 (14.6)       | 7 (9.3)              | 55 (14.9)             | 7 (6.6)               | 8 (15.4)             | 63 (17.5)             | 5 (15.2)             |
| $\geq 50$ years                               | 394 (39.7)       | 21 (28.0)            | 170 (46.2)            | 58 (54.7)             | 18 (34.6)            | 110 (30.6)            | 17 (51.5)            |
| National health insurance holder <sup>b</sup> | 743 (74.8)       | 0 (0.0)              | 329 (89.4)            | 24 (22.6)             | 50 (96.2)            | 340 (94.7)            | 0 (0.0)              |
| Transfer from other hospital                  | 145 (14.6)       | 2 (2.7)              | 70 (19.0)             | 2 (1.9)               | 10 (19.2)            | 57 (15.9)             | 4 (12.1)             |
| Hospitalisation within 90 days <sup>c</sup>   | 299 (30.1)       | 12 (16.0)            | 86 (23.4)             | 20 (18.9)             | 20 (38.5)            | 151 (42.1)            | 10 (30.3)            |
| Surgery in the past 90 days <sup>d</sup>      | 368 (37.1)       | 3 (4.0)              | 162 (44.0)            | 41 (38.7)             | 8 (15.4)             | 142 (39.6)            | 12 (36.4)            |
| Catheter use                                  |                  |                      |                       |                       |                      |                       |                      |
| Central vascular                              | 132 (13.3)       | 4 (5.3)              | 35 (9.5)              | 12 (11.3)             | 1 (1.9)              | 73 (20.3)             | 7 (21.2)             |
| Peripheral vascular                           | 941 (94.8)       | 69 (92.0)            | 357 (97.0)            | 85 (80.2)             | 51 (98.1)            | 347 (96.7)            | 32 (97.0)            |
| Urinary                                       | 363 (36.6)       | 9 (12.0)             | 183 (49.7)            | 35 (33.0)             | 9 (17.3)             | 119 (33.1)            | 8 (24.2)             |
| Intubation                                    | 65 (6.5)         | 3 (4.0)              | 21 (5.7)              | 7 (6.6)               | 1 (1.9)              | 30 (8.4)              | 3 (9.1)              |
| Documented comorbidity                        |                  |                      |                       |                       |                      |                       |                      |
| Malnutrition                                  | 335 (33.7)       | 0 (0.0)              | 165 (44.8)            | 17 (16.0)             | 28 (53.8)            | 121 (33.7)            | 4 (12.1)             |
| Diabetes mellitus                             | 161 (16.2)       | 8 (10.7)             | 68 (18.5)             | 24 (22.6)             | 14 (26.9)            | 39 (10.9)             | 8 (24.2)             |
| Tuberculosis                                  | 120 (12.1)       | 3 (4.0)              | 37 (10.1)             | 7 (6.6)               | 24 (46.2)            | 44 (12.3)             | 5 (15.2)             |
| HIV                                           | 44 (4.4)         | 3 (4.0)              | 10 (2.7)              | 2 (1.9)               | 13 (25.0)            | 16 (4.5)              | 0 (0.0)              |
| HIV on antiretroviral treatment               | 27 (2.7)         | 3 (4.0)              | 4 (1.1)               | 2 (1.9)               | 8 (15.4)             | 10 (2.8)              | 0 (0.0)              |
| Chronic obstructive pulmonary disease         | 11 (1.1)         | 0 (0.0)              | 7 (1.9)               | 0 (0.0)               | 3 (5.8)              | 1 (0.3)               | 0 (0.0)              |
| McCabe score <sup>e</sup>                     |                  |                      |                       |                       |                      |                       |                      |
| Rapidly fatal                                 | 29 (2.9)         | 3 (4.0)              | 8 (2.2)               | 2 (1.9)               | 0 (0.0)              | 15 (4.2)              | 1 (3.0)              |
| Ultimately fatal                              | 217 (21.9)       | 3 (4.0)              | 89 (24.2)             | 32 (30.2)             | 2 (3.8)              | 84 (23.4)             | 7 (21.2)             |
| Non-fatal                                     | 746 (75.1)       | 69 (92.0)            | 270 (73.4)            | 72 (67.9)             | 50 (96.2)            | 260 (72.4)            | 25 (75.8)            |
| Unknown                                       | 1 (0.1)          | 0 (0.0)              | 1 (0.1)               | 0 (0.0)               | 0 (0.0)              | 0 (0.0)               | 0 (0.0)              |
| Prescribed antimicrobial drugs                |                  |                      |                       |                       |                      |                       |                      |
| Median (range) per patient                    | 1 (1-12)         | 1 (1-12)             | 1 (1-9)               | 1 (1-7)               | 1 (1-6)              | 1 (1-10)              | 1 (1-4)              |
| 1                                             | 602 (60.6)       | 58 (77.3)            | 204 (55.4)            | 74 (69.8)             | 32 (61.5)            | 209 (58.2)            | 25 (75.8)            |
| 2                                             | 254 (25.6)       | 11 (14.7)            | 108 (29.3)            | 22 (20.8)             | 8 (15.4)             | 99 (27.6)             | 6 (18.2)             |
| $\geq 3$                                      | 137 (13.8)       | 6 (8.0)              | 56 (15.2)             | 10 (9.4)              | 12 (23.1)            | 51 (14.2)             | 2 (6.1)              |

Data shown reflect the hospital situation on the survey day, and are expressed as number (percentage), unless otherwise specified

<sup>a</sup> Median (IQR) age was 47 (28-60) years for adults, 7 (2-11) months for children <2 years, and 8 (3-14) days for neonates

<sup>b</sup> Jaminan Kesehatan Nasional (JKN); Unknown for 4 (0.4%) participants.

<sup>c</sup> Before the current admission, the patient has been hospitalized within 90 days before the survey date.

<sup>d</sup> The patient underwent surgery in the past 90 days before the survey date, including surgery prior to and during the current admission

<sup>e</sup> McCabe score is a simple subjective method to assess underlying illness severity and classify patients according to a prognosis of rapidly fatal (<1 year), ultimately fatal (1-4 years) and non-fatal (>5 years) (Reilly et al. J Infect Prev 2016;17(3):127-129).

**Table 3. Most common diagnosis for systemic antibiotic use**

| Diagnosis                                                                | Total (n=1,273) |
|--------------------------------------------------------------------------|-----------------|
| Pneumonia or lower respiratory tract infection                           | 353 (27.7)      |
| Skin and soft tissue infection <sup>a</sup>                              | 106 (8.3)       |
| Prophylaxis for gastrointestinal infections <sup>b</sup>                 | 101 (7.9)       |
| Gastrointestinal infection                                               | 69 (5.4)        |
| Prophylaxis for bone and joint infection <sup>c</sup>                    | 58 (4.6)        |
| Prophylaxis for obstetrics or gynaecological infection                   | 58 (4.6)        |
| Intra-abdominal infection <sup>d</sup>                                   | 57 (4.5)        |
| Unknown reason                                                           | 47 (3.7)        |
| Sepsis                                                                   | 46 (3.6)        |
| Prophylaxis for urinary tract infection (surgery or recurrent infection) | 42 (3.3)        |
| Other diagnosis <sup>e</sup>                                             | 35 (2.7)        |
| Ear, nose, throat infection <sup>f</sup>                                 | 30 (2.4)        |
| Upper urinary tract infection <sup>g</sup>                               | 29 (2.3)        |
| Central nervous system infection                                         | 26 (2.0)        |
| Medical prophylaxis for new-born risk factors                            | 25 (2.0)        |

The table lists the 15 most common reasons to prescribe at least one antibiotic for systemic use (J01). Data are expressed as numbers (percentage) and ranked by frequency. Patients recorded with more than one diagnosis were counted by number of diagnoses. Diagnosis were coded based on the GLOBAL-PPS 2018 Diagnostic Code List. The full list of diagnosis is shown in Table S6.

<sup>a</sup> Including cellulitis, wound including surgical site infections, deep soft tissue not involving bone (e.g. infected pressure or diabetic ulcers, abscess).

<sup>b</sup> Including prophylaxis for surgery of the gastrointestinal tract, liver, or biliary tree, and prophylaxis in patients with neutropenia or hepatic failure.

<sup>c</sup> Including prophylaxis for surgical site infections, for plastic or orthopaedic surgery (bone or joint).

<sup>d</sup> Including hepatobiliary, intra-abdominal abscess, etc.

<sup>e</sup> Antibiotic prescribed with documentation for which there is no above diagnosis group.

<sup>f</sup> Including mouth, sinuses, larynx.

<sup>g</sup> Including catheter related urinary tract infection, pyelonephritis.

**Table 4. Quality indicators for antibiotic prescribing, by indication**

| Quality indicators                | Total<br>(n=1,273) | Therapeutic use<br>(n=777) |                        |                          |                        | Prophylactic use<br>(n=410)       |                                    | Other<br>indication <sup>a</sup><br>(n=27) | Unknown<br>indication<br>(n=59) |
|-----------------------------------|--------------------|----------------------------|------------------------|--------------------------|------------------------|-----------------------------------|------------------------------------|--------------------------------------------|---------------------------------|
|                                   |                    | CAI empirical<br>(n=498)   | CAI targeted<br>(n=44) | HAI empirical<br>(n=172) | HAI targeted<br>(n=63) | Medical<br>prophylaxis<br>(n=122) | Surgical<br>prophylaxis<br>(n=288) |                                            |                                 |
| Reason documented                 | 808 (63.5)         | 321 (64.5)                 | 35 (79.5)              | 145 (84.3)               | 45 (71.4)              | 58 (47.5)                         | 172 (59.7)                         | 21 (77.8)                                  | 11 (18.6)                       |
| Stop/review date documented       | 194 (15.2)         | 69 (13.9)                  | 7 (15.9)               | 43 (25.0)                | 18 (28.6)              | 15 (12.3)                         | 38 (13.2)                          | 2 (7.4)                                    | 2 (3.4)                         |
| Treatment duration documented     | 125 (9.8)          | 35 (7.0)                   | 5 (11.4)               | 31 (18.0)                | 12 (19.0)              | 3 (2.5)                           | 35 (12.2)                          | 0 (0.0)                                    | 4 (6.8)                         |
| Guideline compliance              |                    |                            |                        |                          |                        |                                   |                                    |                                            |                                 |
| Yes                               | 478 (37.5)         | 223 (44.8)                 | 17 (38.6)              | 79 (45.9)                | 33 (52.4)              | 23 (18.9)                         | 82 (28.5)                          | 21 (77.8)                                  | 0 (0.0)                         |
| No                                | 378 (29.7)         | 136 (27.3)                 | 16 (36.4)              | 70 (40.7)                | 20 (31.7)              | 6 (4.9)                           | 124 (43.1)                         | 6 (22.2)                                   | 0 (0.0)                         |
| Not assessable <sup>b</sup>       | 358 (28.1)         | 139 (27.9)                 | 11 (25.0)              | 23 (13.4)                | 10 (15.9)              | 93 (76.2)                         | 82 (28.5)                          | 0 (0.0)                                    | 0 (0.0)                         |
| Indication unknown                | 59 (4.6)           | 0 (0.0)                    | 0 (0.0)                | 0 (0.0)                  | 0 (0.0)                | 0 (0.0)                           | 0 (0.0)                            | 0 (0.0)                                    | 59 (100.0)                      |
| Route of administration           |                    |                            |                        |                          |                        |                                   |                                    |                                            |                                 |
| Parenteral (IV)                   | 1,084 (85.2)       | 444 (89.2)                 | 42 (95.5)              | 150 (87.2)               | 58 (92.1)              | 92 (75.4)                         | 237 (82.3)                         | 10 (37.0)                                  | 51 (86.4)                       |
| Oral                              | 183 (14.38)        | 52 (10.44)                 | 2 (4.55)               | 22 (12.79)               | 5 (7.94)               | 30 (24.59)                        | 51 (17.71)                         | 13 (48.15)                                 | 8 (13.56)                       |
| IV-oral switch                    | 48 (26.2)          | 6 (11.5)                   | 1 (50.0)               | 9 (40.9)                 | 1 (20.0)               | 1 (3.3)                           | 28 (54.9)                          | 0 (0.0)                                    | 2 (25.0)                        |
| Other                             | 6 (0.47)           | 2 (0.40)                   | 0 (0.00)               | 0 (0.00)                 | 0 (0.00)               | 0 (0.00)                          | 0 (0.00)                           | 4 (14.81)                                  | 0 (0.00)                        |
| Culture sample taken <sup>c</sup> | 344 (44.3)         | 125 (25.1)                 | 44 (100)               | 112 (65.1)               | 63 (100)               | -                                 | -                                  | -                                          | -                               |

Abbreviations: CAI, community acquired infection; HAI, hospital acquired infection; IV, intravenous

<sup>a</sup> Other indication included antibiotics prescribed for neurotoxoplasmosis, pulmonary tuberculosis, and as motility agent.

<sup>b</sup> Hospital antibiotic guidelines were not available to assess compliance.

<sup>c</sup> Only applicable to therapeutic use.

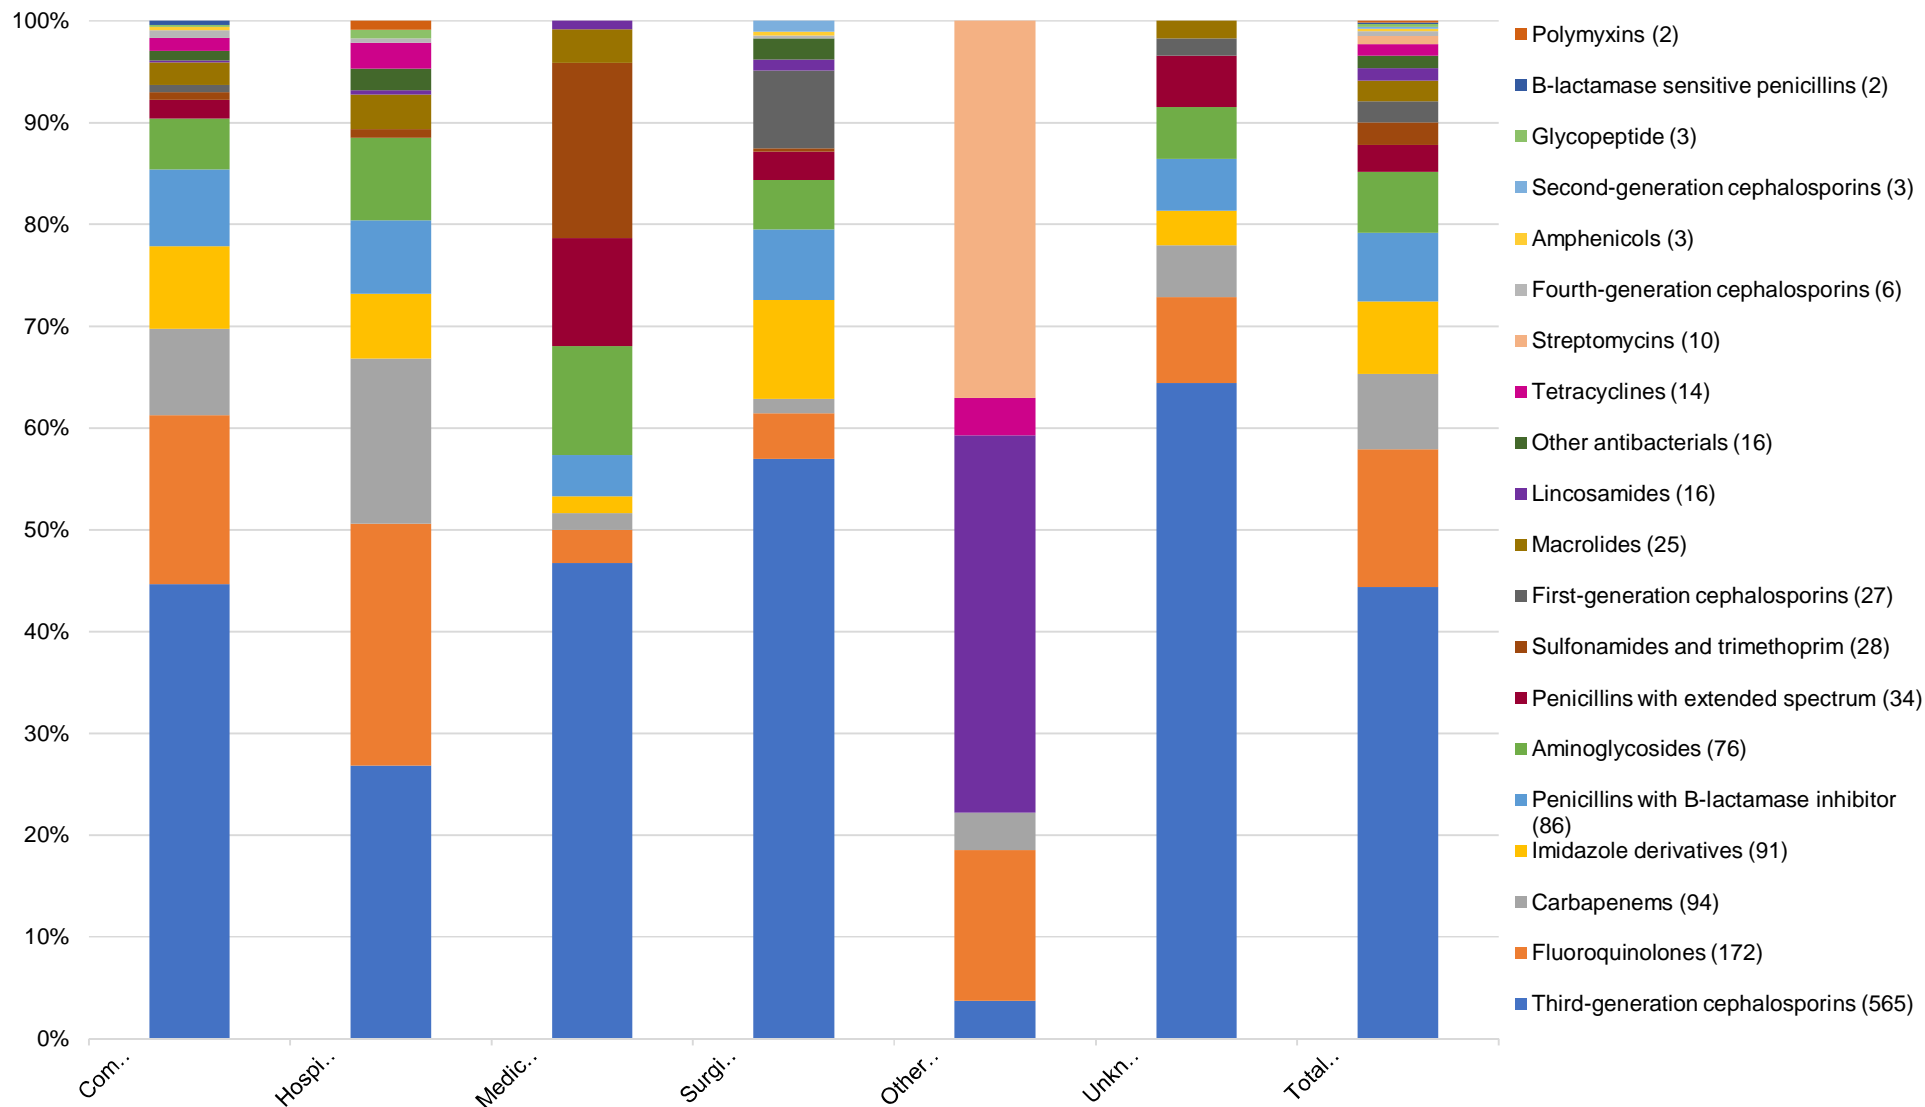

**Figure 1. Systemic antibiotic use by antibiotic class, by indication**

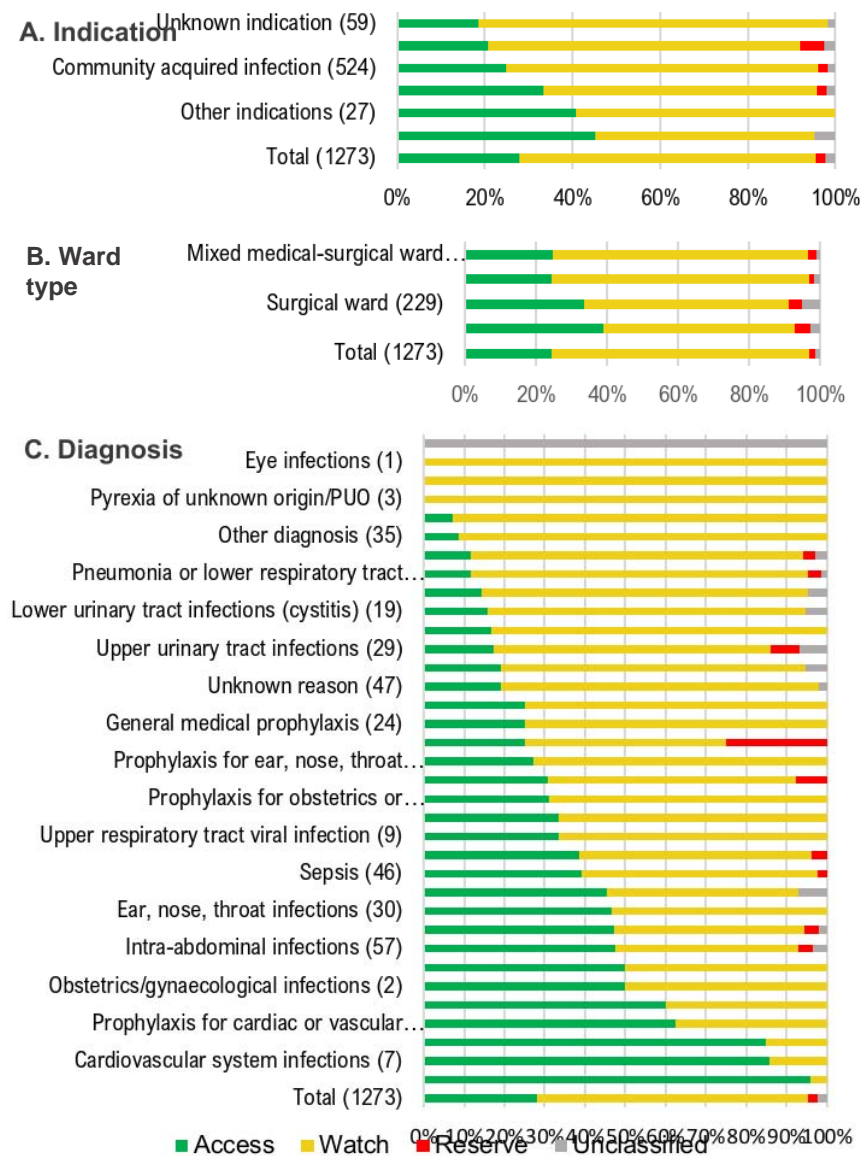

Figure 2. Systemic antibiotic use by AWaRe classification



| Total antibiotic use<br>(n=1273)<br>90.6% DU |            | Therapeutic use            |                            | Prophylactic use                         |           |                                             |           | Other Indication<br>(n=27)<br>85.1% DU | Unknown Indication<br>(n=59)<br>83.2% DU |              |           |               |           |
|----------------------------------------------|------------|----------------------------|----------------------------|------------------------------------------|-----------|---------------------------------------------|-----------|----------------------------------------|------------------------------------------|--------------|-----------|---------------|-----------|
|                                              |            | CAI<br>(n=542)<br>89.7% DU | HAI<br>(n=235)<br>89.4% DU | Medical prophylaxis<br>(n=122)<br>92% DU |           | Surgical prophylaxis<br>(n=288)<br>91.4% DU |           |                                        |                                          |              |           |               |           |
| Ceftriaxone                                  | 341 (26.8) | Ceftriaxone                | 178 (32.8)                 | Levofloxacin                             | 44 (18.7) | Ceftriaxone                                 | 35 (28.7) | Ceftriaxone                            | 76 (26.4)                                | Clindamycin  | 10 (37.0) | Ceftriaxone   | 29 (49.2) |
| Levofloxacin                                 | 136 (10.7) | Levofloxacin               | 73 (13.5)                  | Meropenem                                | 32 (13.6) | Cotrimoxazole                               | 21 (17.2) | Cefixime                               | 33 (11.5)                                | Streptomycin | 10 (37.0) | Cefotaxime    | 7 (11.9)  |
| Metronidazole                                | 90 (7.1)   | Metronidazole              | 44 (8.1)                   | Ceftriaxone                              | 23 (9.8)  | Gentamicin                                  | 13 (10.7) | Cefoperazone                           | 32 (11.1)                                | Levofloxacin | 3 (11.1)  | Levofloxacin  | 5 (8.5)   |
| Meropenem                                    | 82 (6.4)   | Meropenem                  | 42 (7.7)                   | Amikacin                                 | 15 (6.4)  | Cefotaxime                                  | 10 (8.2)  | Metronidazole                          | 28 (9.7)                                 |              |           | Metronidazole | 2 (3.4)   |
| Cefotaxime                                   | 71 (5.6)   | Ampicillin β-LI            | 29 (5.4)                   | Metronidazole                            | 14 (6.0)  | Ampicillin                                  | 9 (7.4)   | Cefazolin                              | 18 (6.2)                                 |              |           | Meropenem     | 2 (3.4)   |
| Cefoperazone                                 | 52 (4.1)   | Cefotaxime                 | 27 (5.0)                   | Ceftazidime                              | 14 (6.0)  | Cefoperazone βLI                            | 6 (4.9)   | Amoxicillin βLI                        | 16 (5.6)                                 |              |           | Gentamicin    | 2 (3.4)   |
| Cefixime                                     | 51 (4.0)   | Gentamicin                 | 17 (3.1)                   | Cefotaxime                               | 12 (5.1)  | Cefoperazone                                | 4 (3.3)   | Cefotaxime                             | 14 (4.9)                                 |              |           | Amoxicillin   | 2 (3.4)   |
| Ampicillin βLI                               | 44 (3.5)   | Cefixime                   | 12 (2.2)                   | Ciprofloxacin                            | 9 (3.8)   | Ampicillin βLI                              | 4 (3.3)   | Levofloxacin                           | 8 (2.8)                                  |              |           |               |           |
| Gentamicin                                   | 42 (3.3)   | Cefoperazone               | 11 (2.0)                   | Cefoperazone βLI                         | 6 (2.6)   | Amoxicillin                                 | 4 (3.3)   | Gentamicin                             | 7 (2.4)                                  |              |           |               |           |
| Amikacin                                     | 32 (2.5)   | Amikacin                   | 10 (1.8)                   | Azithromycin                             | 6 (2.6)   | Levofloxacin                                | 3 (2.5)   | Cefoperazone βLI                       | 6 (2.1)                                  |              |           |               |           |
| Amoxicillin βLI                              | 31 (2.4)   | Cefoperazone βLI           | 9 (1.7)                    | Tigecycline                              | 6 (2.6)   | Erythromycin                                | 3 (2.5)   | Amikacin                               | 6 (2.1)                                  |              |           |               |           |
| Cefoperazone βLI                             | 28 (2.2)   | Ciprofloxacin              | 9 (1.7)                    | Cefoperazone                             | 5 (2.1)   |                                             |           | Fosfomycin                             | 6 (2.1)                                  |              |           |               |           |
| Cotrimoxazole                                | 28 (2.2)   | Azithromycin               | 9 (1.7)                    | Ampicillin βLI                           | 5 (2.1)   |                                             |           | Ampicillin βLI                         | 5 (1.7)                                  |              |           |               |           |
| Ceftazidime                                  | 21 (1.6)   | Amoxicillin βLI            | 8 (1.5)                    | Amoxicillin βLI                          | 5 (2.1)   |                                             |           | Ampicillin                             | 4 (1.4)                                  |              |           |               |           |
| Ciprofloxacin                                | 21 (1.6)   | Moxifloxacin               | 8 (1.5)                    | Fosfomycin                               | 5 (2.1)   |                                             |           | Cefadroxil                             | 4 (1.4)                                  |              |           |               |           |
| Cefazolin                                    | 18 (1.5)   |                            |                            | Piperacillin βLI                         | 5 (2.1)   |                                             |           |                                        |                                          |              |           |               |           |
| Ampicillin                                   | 17 (1.3)   |                            |                            | Doripenem                                | 4 (1.7)   |                                             |           |                                        |                                          |              |           |               |           |
| Amoxicillin                                  | 16 (1.3)   |                            |                            |                                          |           |                                             |           |                                        |                                          |              |           |               |           |
| Azithromycin                                 | 16 (1.3)   |                            |                            |                                          |           |                                             |           |                                        |                                          |              |           |               |           |
| Clindamycin                                  | 16 (1.3)   |                            |                            |                                          |           |                                             |           |                                        |                                          |              |           |               |           |

Data are expressed as numbers (percentage). Antibacterial prescriptions for systemic use (J01) were included.

Abbreviations: DU 90%, the number of drugs which account for 90% of the prescriptions; CAI, community acquired infection; HAI, hospital acquired infection; βLI, and beta lactamase inhibitor

**Figure 3. Systemic antibiotic use by indication based on AWaRe classification**
